# Supplementary material for: Usefulness of Silent MRA for Evaluation of Aneurysm after Stent-Assisted Coil Embolization
Source: PubMed Central journal article supplement — Korean J Radiol. 2022 Jan 4;23(2):246–55. doi: 10.3348/kjr.2021.0332 (PMC8814699; doi:10.3348/kjr.2021.0332), 2022-01-04
Supplement: kjr-23-246-s001.pdf [file kjr-23-246-s001.pdf]

## SUPPLEMENT

**Supplementary Table 1. Assessment of Image Quality according to Stent Type on Silent MRA and TOF MRA**

| Used Stent      | Silent      |                 | TOF         |                 | <i>P</i> |
|-----------------|-------------|-----------------|-------------|-----------------|----------|
|                 | Mean ± SD   | Median (Q1, Q3) | Mean ± SD   | Median (Q1, Q3) |          |
| Open (n = 71)   | 4.66 ± 0.53 | 5 (4, 5)        | 3.21 ± 0.84 | 3 (3, 4)        | < 0.001  |
| Closed (n = 30) | 3.70 ± 1.02 | 4 (3, 4)        | 1.77 ± 0.68 | 2 (1, 2)        | < 0.001  |

Closed = Enterprise/LVIS Jr/Solitaire AB, MRA = MR angiography, Open = Neuroform Atlas, SD = standard deviation, Silent MRA = MRA using the Silent Scan algorithm, TOF = time-of-flight

**Supplementary Table 2. Accuracy of Silent MRA and TOF MRA for Evaluating the Status of Aneurysm Occlusion**

| Used Stent      | Type of MRA    | Sensitivity (%) | Specificity (%) | PPV (%) | NPV (%) |
|-----------------|----------------|-----------------|-----------------|---------|---------|
| Open (n = 71)   | Silent         | 96.4            | 100             | 100     | 97.7    |
|                 | TOF            | 14.3            | 100             | 100     | 64.2    |
|                 | <i>p</i> value | < 0.001         | NA              |         |         |
| Closed (n = 30) | Silent         | 100             | 100             | 100     | 100     |
|                 | TOF            | 36.4            | 100             | 100     | 73.1    |
|                 | <i>p</i> value | 0.008           | NA              |         |         |

Closed = Enterprise/LVIS Jr/Solitaire AB, MRA = MR angiography, NA = not applied, NPV = negative predictive value, Open = Neuroform Atlas, PPV = positive predictive value, Silent MRA = MRA using the Silent Scan algorithm, TOF = time-of-flight
